# Supplementary material for: The Effect of Language on Income Smoothing: Cross-Country Evidence
Source: Atypon-hosted journal article supplement (doi:10.1287/mnsc.2021.01753), 2023-10-18
Supplement: mnsc.2021.01753.sm1.pdf [file mnsc.2021.01753.sm1.pdf]

## **Online Appendix for**

### **“The Effect of Language on Income Smoothing: Cross-Country Evidence”**

Wenjiao Cao, Linda A. Myers, and Zhifang Zhang

#### **Contents:**

**Online Appendix A.** Measuring Income Smoothing

**Online Appendix B.** Decomposing Income Smoothing

## Online Appendix A. Measuring Income Smoothing

We use three measures from prior literature to capture corporate income smoothing behavior. Our first measure, *IS1*, it is calculated as the country-industry ratio of the cross-sectional standard deviation of operating income divided by the standard deviation of cash flow from operations, multiplied by -1:

$$IS1 = \sigma(NI)/\sigma(CFO) \times -1$$

where

*NI* = net income scaled by lagged total assets,  $oiadp_t/at_{t-1}$ , and *CFO* = cash flow from operations scaled by lagged total assets,  $oancf_t/at_{t-1}$ .

Our second measure, *IS2*, is calculated as the country-industry Spearman correlation between changes in total accruals and contemporaneous changes in operating cash flow, multiplied by -1.

$$IS2 = \rho[\Delta ACC, \Delta CFO] \times -1$$

where

*ACC* = total accruals,  $[\Delta \text{current assets } (\Delta act_t) - \Delta \text{cash } (\Delta che_t) - \Delta \text{current liabilities } (\Delta lct_t) + \Delta \text{short-term debt } (\Delta dlc_t) - \text{depreciation } (dp_t)]/\text{lagged total assets } (at_{t-1})$  and *CFO* is defined above.

The third measure, *IS3*, is calculated as the country-industry Spearman correlation between the change in discretionary accruals ( $\Delta DAC$ ) and the change in pre-discretionary income ( $\Delta NDNI$ ) (i.e., net income minus discretionary accruals), multiplied by -1:

$$IS3 = \rho[\Delta DAC, \Delta NDNI] \times -1$$

where

*DAC* = discretionary accruals calculated using the performance-adjusted modified Jones model (Kothari et al. 2005), *NDNI* = net income minus discretionary accruals,  $NI - DAC$ , and *NI* is defined above.

For each of our primary measures, we first calculate the input at the firm-year level and then we compute the ratio/correlation at the country-industry unit level. That is, for each country-industry group, we compute the cross-sectional ratio/correlation for *IS1*, *IS2*, and *IS3*, respectively. Following Dou et al. (2013) and Baik et al. (2020), we use principal component analysis to obtain an aggregate score (*IS\_Score*) based on these three measures.

We compute the ratio/correlation at different unit level in robustness analyses. To compute *IS\_Score\_CIY*, we estimate the individual measures at the country-industry-year unit and to compute *IS\_Score\_FY* and *IS\_Score\_UK*, we calculate the individual measures at the firm-year unit over rolling 5-year windows (i.e.,  $t_{-4}$  to  $t$ ).

## Online Appendix B. Decomposing Income Smoothing

Our decomposition follows the modified model in Dou et al. (2013), which takes into account the difference in the predictability of earnings for profit versus loss firms. We estimate the following regression at the country-industry level:

$$R_t = b_0 + b_1X_{t-1} + b_2X_t + b_{3P}Profit * X_{t3} + b_{3L}Loss * X_{t3} + b_4R_{t3} + e_t \quad (C1)$$

where  $R_t$  is the stock return in year  $t$ ,  $X_{t-1}$  and  $X_t$  are earnings per share (EPS) in years  $t-1$  and  $t$ , respectively,  $Profit$  ( $Loss$ ) is an indicator variable set to one if the three-year aggregate EPS in years  $t+1$  through  $t+3$  is positive (negative),  $X_{t3}$  is the sum of EPS in years  $t+1$  through  $t+3$ , and  $R_{t3}$  is the stock return in years  $t+1$  through  $t+3$ .  $b_{3P}$  and  $b_{3L}$  capture revisions in investors' expectations about future earnings.

Next, for each country with 20 or more industries, we estimate the following regression:

$$IS\_Score_{c,i} = \alpha_0 + \alpha_1 b_{3P\ c,i} + \alpha_2 b_{3L\ c,i} + \varepsilon_{c,i} \quad (C2)$$

The predicted value of  $IS\_Score_{c,i}$  captures the informational component of income smoothing ( $IS\_Info_{c,i}$ ) and the residual,  $\varepsilon_{c,i}$ , captures the garbled component of income smoothing ( $IS\_Garb_{c,i}$ ). That is,

$$IS\_Info_{c,i} = \hat{\alpha}_0 + \hat{\alpha}_1 b_{3P\ c,i} + \hat{\alpha}_2 b_{3L\ c,i} \quad (C3a)$$

$$IS\_Garb_{c,i} = \varepsilon_{c,i} \quad (C3b)$$
